# Supplementary material for: Pre-Transplant Alpha-Fetoprotein > 25.5 and Its Dynamic on Waitlist Are Predictors of HCC Recurrence after Liver Transplantation for Patients Meeting Milan Criteria
Source: MDPI journal article supplement (doi:10.3390/cancers13235976), 2021-11-27
Supplement: s1 [file s1]

Article

# Pre-Transplant Alpha-Fetoprotein > 25.5 and Its Dynamic on Waitlist Are Predictors of HCC Recurrence after Liver Transplantation for Patients Meeting Milan Criteria

Bianca Magro, Domenico Pinelli, Massimo De Giorgio, Maria Grazia Lucà, Arianna Ghirardi, Alessandra Carrobbio, Giuseppe Baronio, Luca Del Prete, Franck Nounamo, Andrea Gianatti, Michele Colledan and Stefano Faggioli

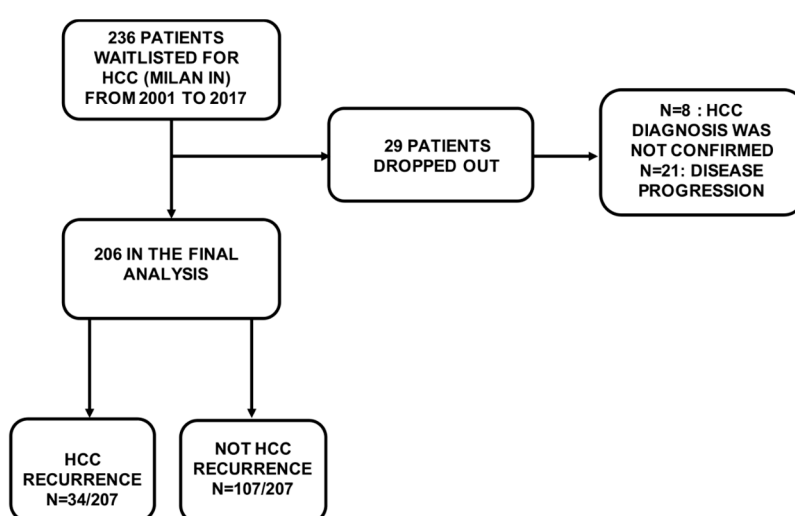

Figure S1. Patient selection.

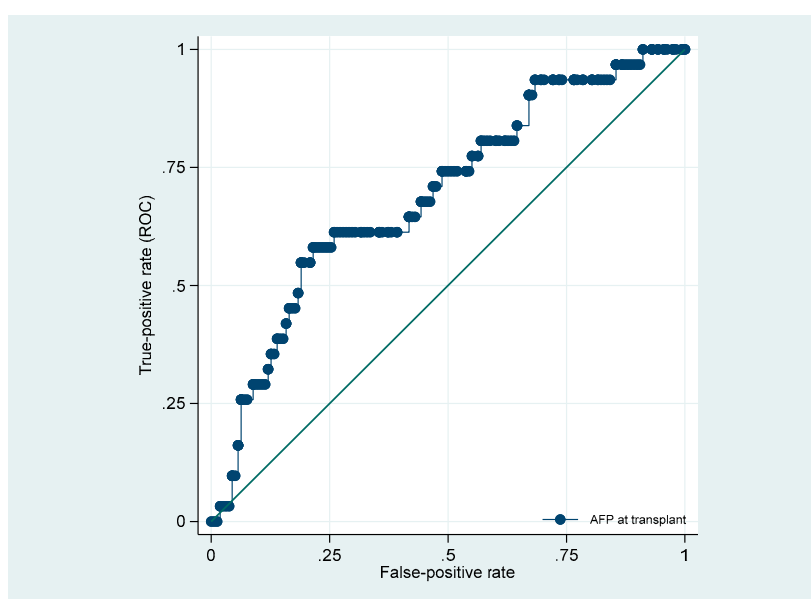

**Figure S2.** Receiving operating characteristics curve of AFP at transplant for the discrimination of cases of recurrences AUC = 0.69, 95% CI: 0.58–0.80.

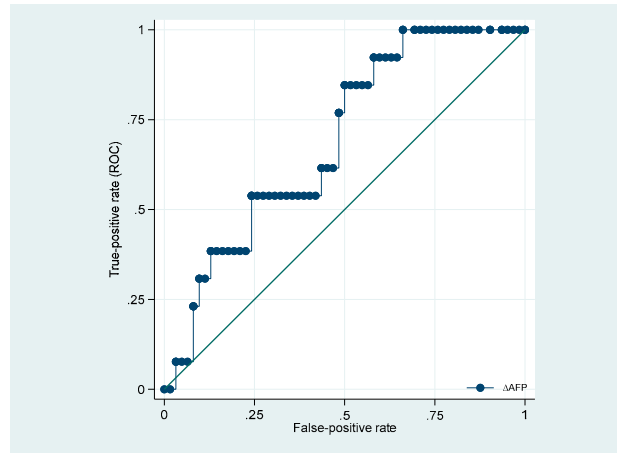

**Figure S3.** Receiving operating characteristics curve of relative increase in AFP values from entry to transplant ( $\Delta$ AFP) for the discrimination of cases of recurrences (AUC = 0.69, 95% CI 0.55–0.83).

**Table S1.** All causes of mortality.

| Causes.              | N  | DEATH TOT (N = 75) |
|----------------------|----|--------------------|
| HCC                  | 22 | 29,3%              |
| NOT HCC              | 53 | 70,7%              |
| PNF                  | 2  | 2,7%               |
| Infections           | 11 | 14,7%              |
| Surgical             | 1  | 1,3%               |
| Cardiovascular       | 12 | 16,0%              |
| Neoplasia            | 12 | 16,0%              |
| Cirrhosis recurrence | 9  | 12,0%              |
| Others               | 6  | 8,0%               |
